# Supplementary material for: Pyrolysis of High-Ash Natural Microalgae from Water Blooms: Effects of Acid Pretreatment
Source: MDPI journal article supplement (doi:10.3390/toxins13080542), 2021-08-03
Supplement: s1 [file s1]

# Supplementary Materials: Pyrolysis of High-Ash Natural Microalgae from Water Blooms: Effects of Acid Pretreatment

Longfei Liu, Yichen Liu, Wenli Wang, Yue Wang, Guiying Li and Changwei Hu

**Table S1.** The ultimate analysis, HHV of microalgae samples.

|                          | NA    | 0 M   | 0.1 M | 1 M   | 2 M   | 4 M   | 6 M   | 8 M   |
|--------------------------|-------|-------|-------|-------|-------|-------|-------|-------|
| C(wt%)                   | 33.01 | 32.75 | 32.99 | 35.95 | 36.18 | 36.06 | 34.22 | 29.98 |
| H(wt%)                   | 5.14  | 5.24  | 5.26  | 5.28  | 5.31  | 5.25  | 4.98  | 5.84  |
| O <sup>a</sup> (wt%)     | 55.26 | 55.1  | 54.95 | 51.09 | 50.91 | 51.09 | 53.65 | 59.65 |
| N(wt%)                   | 6.59  | 6.91  | 6.8   | 7.68  | 7.6   | 7.6   | 7.15  | 4.53  |
| H/C(molar ratio)         | 0.16  | 0.16  | 0.16  | 0.15  | 0.15  | 0.15  | 0.15  | 0.19  |
| O/C(molar ratio)         | 1.67  | 1.68  | 1.67  | 1.42  | 1.41  | 1.42  | 1.57  | 1.99  |
| N/C(molar ratio)         | 0.20  | 0.21  | 0.21  | 0.21  | 0.21  | 0.21  | 0.21  | 0.15  |
| HHV <sup>b</sup> (MJ/kg) | 14.90 | 14.82 | 14.86 | 15.80 | 15.84 | 15.83 | 15.37 | 13.37 |

<sup>a</sup> by difference <sup>b</sup> HHV =  $(3.55C^2 - 232C - 2230H + 51.2C \times H + 131N + 20600) \times 10^{-3}$ .

**Table S2.** The HHV of bio-oil from different samples by pyrolysis.

|                          | NA    | 0 M   | 0.1 M | 1 M   | 2 M   | 4 M   | 6 M   | 8 M   |
|--------------------------|-------|-------|-------|-------|-------|-------|-------|-------|
| C(wt%)                   | 61.43 | 63.56 | 63.88 | 63.51 | 64.14 | 63.34 | 63.54 | 62.22 |
| H(wt%)                   | 8.06  | 8.27  | 8.27  | 8.33  | 8.32  | 8.28  | 8.51  | 8.24  |
| O <sup>a</sup> (wt%)     | 20.39 | 17.3  | 16.68 | 17.44 | 17.26 | 17.93 | 17.75 | 19.19 |
| N(wt%)                   | 10.12 | 10.87 | 11.17 | 10.72 | 10.28 | 10.45 | 10.20 | 10.35 |
| H/C(molar ratio)         | 0.13  | 0.13  | 0.13  | 0.13  | 0.13  | 0.13  | 0.13  | 0.13  |
| O/C(molar ratio)         | 0.33  | 0.27  | 0.26  | 0.27  | 0.27  | 0.28  | 0.28  | 0.31  |
| N/C(molar ratio)         | 0.16  | 0.17  | 0.17  | 0.17  | 0.16  | 0.16  | 0.16  | 0.17  |
| HHV <sup>b</sup> (MJ/kg) | 28.45 | 30.09 | 30.34 | 30.10 | 30.44 | 29.90 | 30.24 | 29.14 |

<sup>a</sup> by difference <sup>b</sup> HHV =  $(3.55C^2 - 232C - 2230H + 51.2C \times H + 131N + 20600) \times 10^{-3}$ .

**Table S3.** The relative content of small molecular compounds in the bio-oil.

|                                               | Ash           | 0 M           | 0.1 M         | 1 M           | 2 M           | 4 M           | 6 M           | 8 M           |
|-----------------------------------------------|---------------|---------------|---------------|---------------|---------------|---------------|---------------|---------------|
| <b>Hydrocarbons</b>                           | <b>12.90%</b> | <b>15.60%</b> | <b>15.66%</b> | <b>19.86%</b> | <b>26.67%</b> | <b>19.95%</b> | <b>18.17%</b> | <b>15.42%</b> |
| Heptadecane                                   | 9.68%         | 11.38%        | 10.19%        | 12.75%        | 16.29%        | 11.82%        | 10.82%        | 8.59%         |
| Heptadecane,9-hexyl-                          | 3.22%         | 4.22%         | 3.38%         | 4.34%         | 7.40%         | 5.40%         | 4.34%         | 5.08%         |
| dodecane,5,8-diethyl-                         | —             | —             | 2.09%         | 2.77%         | 2.99%         | 2.72%         | 3.01%         | 1.75%         |
| <b>Aromatic Compounds</b>                     | <b>6.31%</b>  | <b>12.66%</b> | <b>13.07%</b> | <b>3.14%</b>  | <b>1.97%</b>  | <b>0.54%</b>  | <b>2.07%</b>  | <b>0.52%</b>  |
| benzene,1-isocyano-2-methyl-                  | 2.97%         | 9.01%         | 7.59%         | 2.10%         | 1.97%         | 0.54%         | 2.07%         | 0.52%         |
| Carbamic acid, methyl-, phenylester           | 0.83%         | 1.60%         | 1.23%         | —             | —             | —             | —             | —             |
| phenol,3-methyl-                              | 2.51%         | 2.06%         | 2.22%         | —             | —             | —             | —             | —             |
| benzyloxymethylimine                          | —             | —             | 2.03%         | 1.04%         | —             | —             | —             | —             |
| <b>Carboxylic acids</b>                       | <b>41.14%</b> | <b>29.41%</b> | <b>34.29%</b> | <b>48.52%</b> | <b>51.62%</b> | <b>62.53%</b> | <b>59.83%</b> | <b>63.18%</b> |
| n-hexadecanoic acid                           | 22.44%        | 19.12%        | 26.21%        | 41.88%        | 45.42%        | 58.77%        | 56.49%        | 54.95%        |
| dodecanoic acid, 3-hydroxy-                   | 2.03%         | 3.11%         | 1.00%         | 2.04%         | 0.85%         | 1.67%         | 1.18%         | 0.73%         |
| 9-hexadecenoic acid                           | 1.73%         | 3.10%         | 1.90%         | 4.60%         | 5.35%         | 2.09%         | 2.16%         | 2.86%         |
| acetic acid                                   | 5.92%         | 1.52%         | 2.22%         | —             | —             | —             | —             | —             |
| propanoic acid, 2-methyl-                     | 1.33%         | —             | —             | —             | —             | —             | —             | —             |
| butanoic acid                                 | 3.19%         | —             | —             | —             | —             | —             | —             | —             |
| pentanoic acid                                | 1.91%         | —             | —             | —             | —             | —             | —             | —             |
| Pentadecanoic acid,14-methyl-,<br>methylester | 2.60%         | 2.56%         | 2.96%         | —             | —             | —             | —             | —             |
| E-9-tetradecenoic acid                        | —             | —             | —             | —             | —             | —             | —             | 1.28%         |
| Oleic acid                                    | —             | —             | —             | —             | —             | —             | —             | 3.36%         |
| <b>Nitrogen Compounds</b>                     | <b>29.10%</b> | <b>31.48%</b> | <b>27.42%</b> | <b>17.11%</b> | <b>12.20%</b> | <b>10.00%</b> | <b>9.80%</b>  | <b>18.52%</b> |
| hexadecanamide                                | 11.31%        | 16.22%        | 11.91%        | 11.67%        | 7.97%         | 7.27%         | 7.85%         | 12.05%        |
| hexadecanenitrile                             | 10.40%        | 10.11%        | 8.85%         | 3.02%         | 3.53%         | 2.73%         | 1.95%         | 6.47%         |
| hydrazine,methyl-                             | —             | —             | —             | 0.38%         | 0.70%         | —             | —             | —             |
| pyrrole                                       | 0.93%         | 1.01%         | 1.56%         | —             | —             | —             | —             | —             |
| pentanenitrile,4-methyl-                      | —             | 0.99%         | 0.73%         | 1.30%         | —             | —             | —             | —             |
| 1H-pyrrole,3-methyl-                          | 0.77%         | 0.47%         | 0.97%         | —             | —             | —             | —             | —             |
| 1H-pyrrole,2-methyl-                          | 0.47%         | 0.38%         | 1.04%         | —             | —             | —             | —             | —             |
| 1H-pyrrole,2-ethyl-4-methyl-                  | 0.38%         | —             | —             | —             | —             | —             | —             | —             |
| pyrrole,4-ethyl-2-methyl-                     | 0.42%         | —             | —             | —             | —             | —             | —             | —             |
| formide, N-methyl-N-4-                        | 2.85%         | 2.30%         | 2.36%         | 0.73%         | —             | —             | —             | —             |
| 2-[2-methyl-propenyl]-cyclohexanone oxime     | 1.57%         | —             | —             | —             | —             | —             | —             | —             |
| <b>Oxygen Compounds</b>                       | <b>10.55%</b> | <b>10.85%</b> | <b>9.56%</b>  | <b>11.38%</b> | <b>7.54%</b>  | <b>6.98%</b>  | <b>10.14%</b> | <b>2.35%</b>  |
| Z-9-pentadecenol                              | 3.03%         | 7.33%         | 4.63%         | 6.88%         | 4.28%         | 3.90%         | 6.69%         | —             |
| 13-heptadecyn-1-ol                            | 1.36%         | 2.28%         | 2.54%         | 1.83%         | 3.26%         | 3.08%         | 3.45%         | 2.35%         |
| cyclohexanone,4-hydroxy-                      | 0.93%         | —             | —             | —             | —             | —             | —             | —             |
| 2-cyclopenten-1-one,2-methyl-                 | 1.19%         | 1.23%         | —             | —             | —             | —             | —             | —             |
| 1,2,3,4-cyclopentaneterol                     | 1.01%         | —             | —             | —             | —             | —             | —             | —             |
| pyrrolidone,5-[3-methoxy-butyl]-              | 2.25%         | —             | —             | —             | —             | —             | —             | —             |
| corymbolone                                   | 0.77%         | —             | —             | —             | —             | —             | —             | —             |
| 7-hexadecyn-1-ol                              | —             | —             | 1.49%         | 1.47%         | —             | —             | —             | —             |
| 2-hexadecanol                                 | —             | —             | 0.90%         | 1.19%         | —             | —             | —             | —             |

**Table S4.** Joint hypotheses test between acid concentration and variations.

| Variations           | Levene statistic | df1 | df2 | Significance |
|----------------------|------------------|-----|-----|--------------|
| Ash content          | 0.366            | 6   | 14  | 0.889        |
| Ca                   | 3.927            | 6   | 14  | 0.016        |
| Mg                   | 0.800            | 6   | 14  | 0.586        |
| Al                   | 1.005            | 6   | 14  | 0.460        |
| Carbohydrate content | 0.442            | 6   | 14  | 0.839        |
| Liquid yield         | 0.520            | 6   | 14  | 0.784        |

**Table S5.** ANOVA analysis between acid concentration and variations.

| Variations           | F value    | Significance |
|----------------------|------------|--------------|
| Ash content          | 822.434    | 0.000        |
| Ca                   | 487.785    | 0.000        |
| Mg                   | 128.118    | 0.000        |
| Al                   | 14,680.731 | 0.000        |
| Carbohydrate content | 80.393     | 0.000        |
| Liquid yield         | 108.339    | 0.000        |

**Table S6.** Post hoc test of ANOVA analysis between acid concentration and ash content.

| Acid Concentration                |              | N | $\alpha = 0.05$ Subsets |       |       |       |       |
|-----------------------------------|--------------|---|-------------------------|-------|-------|-------|-------|
|                                   |              |   | 1                       | 2     | 3     | 4     | 5     |
| Student-Newman-Keuls <sup>a</sup> | 2.0          | 3 | 21.1                    |       |       |       |       |
|                                   | 1.0          | 3 |                         | 28.6  |       |       |       |
|                                   | 4.0          | 3 |                         |       | 30.9  |       |       |
|                                   | 6.0          | 3 |                         |       |       | 32.9  |       |
|                                   | 0.1          | 3 |                         |       |       | 33.6  |       |
|                                   | 0.0          | 3 |                         |       |       | 33.7  |       |
|                                   | 8.0          | 3 |                         |       |       |       | 43.3  |
|                                   | Significance |   | 1.000                   | 1.000 | 1.000 | 0.069 | 1.000 |

The group mean of a subset of the same class was displayed. <sup>a</sup> The harmonic mean sample size = 3.000.

**Table S7.** Post hoc test of ANOVA analysis between acid concentration and content of Ca.

| Acid Concentration                |              | N | $\alpha = 0.05$ Subsets |       |       |       |       |
|-----------------------------------|--------------|---|-------------------------|-------|-------|-------|-------|
|                                   |              |   | 1                       | 2     | 3     | 4     | 5     |
| Student-Newman-Keuls <sup>a</sup> | 2.0          | 3 | 0.32                    |       |       |       |       |
|                                   | 1.0          | 3 | 0.44                    |       |       |       |       |
|                                   | 0.1          | 3 |                         | 1.05  |       |       |       |
|                                   | 0.0          | 3 |                         |       | 2.10  |       |       |
|                                   | 4.0          | 3 |                         |       | 2.32  |       |       |
|                                   | 6.0          | 3 |                         |       |       | 4.83  |       |
|                                   | 8.0          | 3 |                         |       |       |       | 5.42  |
|                                   | Significance |   | 0.375                   | 1.000 | 0.115 | 1.000 | 1.000 |

The group mean of a subset of the same class was displayed. <sup>a</sup> The harmonic mean sample size = 3.000.

**Table S8.** Post hoc test of ANOVA analysis between acid concentration and content of Mg.

| Acid Concentration                |              | N | $\alpha = 0.05$ Subsets |       |       |       |
|-----------------------------------|--------------|---|-------------------------|-------|-------|-------|
|                                   |              |   | 1                       | 2     | 3     | 4     |
| Student-Newman-Keuls <sup>a</sup> | 2.0          | 3 | 0.50                    |       |       |       |
|                                   | 4.0          | 3 | 0.52                    |       |       |       |
|                                   | 8.0          | 3 |                         | 1.07  |       |       |
|                                   | 6.0          | 3 |                         |       | 1.18  |       |
|                                   | 0.1          | 3 |                         |       | 1.21  | 1.21  |
|                                   | 0.0          | 3 |                         |       |       | 1.30  |
|                                   | 1.0          | 3 |                         |       |       | 1.31  |
|                                   | Significance |   | 0.657                   | 1.000 | 0.507 | 0.094 |

The group mean of a subset of the same class was displayed. <sup>a</sup> The harmonic mean sample size = 3.000.

**Table S9.** Post hoc test of ANOVA analysis between acid concentration and content of Al.

|                                   |                    |   | $\alpha = 0.05$ Subsets |       |       |       |       |       |       |
|-----------------------------------|--------------------|---|-------------------------|-------|-------|-------|-------|-------|-------|
|                                   | Acid Concentration | N | 1                       | 2     | 3     | 4     | 5     | 6     | 7     |
| Student-Newman-Keuls <sup>a</sup> | 4.0                | 3 | 5.78                    |       |       |       |       |       |       |
|                                   | 2.0                | 3 |                         | 6.27  |       |       |       |       |       |
|                                   | 6.0                | 3 |                         |       | 14.15 |       |       |       |       |
|                                   | 8.0                | 3 |                         |       |       | 14.64 |       |       |       |
|                                   | 1.0                | 3 |                         |       |       |       | 17.76 |       |       |
|                                   | 0.1                | 3 |                         |       |       |       |       | 21.95 |       |
|                                   | 0.0                | 3 |                         |       |       |       |       |       | 23.32 |
|                                   | Significance       |   | 1.000                   | 1.000 | 1.000 | 1.000 | 1.000 | 1.000 | 1.000 |

The group mean of a subset of the same class was displayed. <sup>a</sup> The harmonic mean sample size = 3.000.

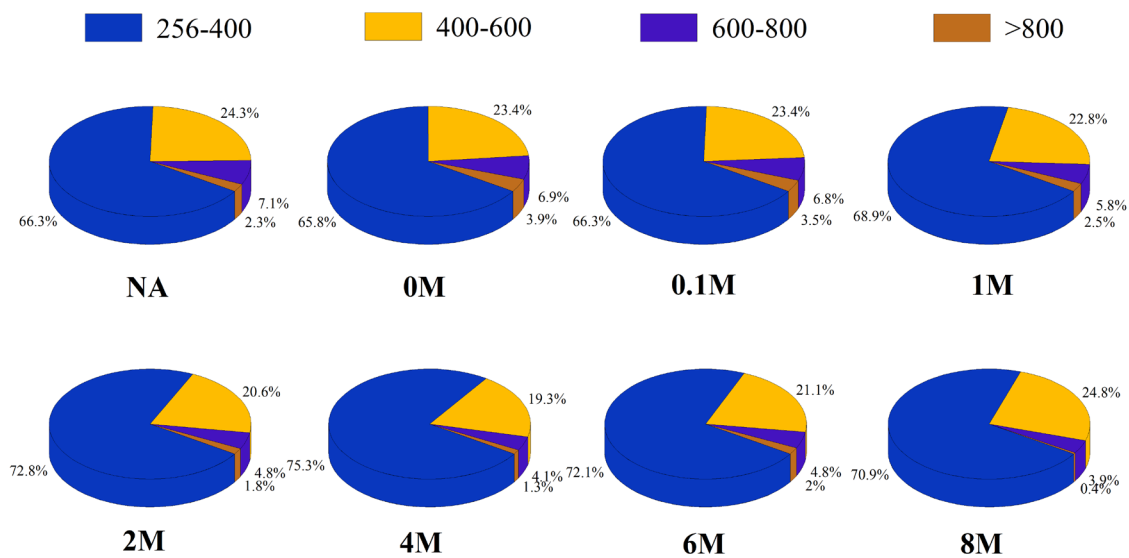

Figure S1. The molecular weight distribution of the bio-oil.
